# Supplementary material for: The Enigma of the ʹSmokerʹs Paradoxʹ: Results from a Single‐Center Registry of Patients with STEMI Undergoing Primary Percutaneous Coronary Intervention
Source: Preprints.org preprint supplement (doi:10.20944/preprints202401.1864.v1), 2024-01-26
Supplement: Supplementary file 1 [file supplementary]

| **Characteristic** | **N** | **Non-Smokers**  N = 8861 | **Smokers**  N = 8861 | **p-value**2 |
| --- | --- | --- | --- | --- |
| Male | 1,772 | 715 (81%) | 696 (79%) | 0.3 |
| Age | 1,772 | 65 (57, 73) | 64 (57, 72) | 0.3 |
| Diabetes type II | 1,772 | 168 (19%) | 152 (17%) | 0.3 |
| Hypertension | 1,772 | 491 (55%) | 483 (55%) | 0.7 |
| Dyslipidemia | 1,772 | 365 (41%) | 363 (41%) | >0.9 |
| CAD (Family) | 1,772 | 255 (29%) | 265 (30%) | 0.6 |
| Past Interventions | 1,772 | 107 (12%) | 96 (11%) | 0.4 |
| Past ACS | 1,772 | 94 (11%) | 91 (10%) | 0.8 |
| Shock | 1,772 | 46 (5.2%) | 46 (5.2%) | >0.9 |
| LVEF (%) | 1,772 | 45 (40, 50) | 45 (40, 50) | 0.5 |
| 1n (%); Median (IQR) | | | | |
| 2Pearson's Chi-squared test; Wilcoxon rank sum test | | | | |

Supplemental Table 1: post-matching Baseline Characteristics

| **Characteristic** | **N** | **Non-Smokers**  N = 8861 | **Smokers**  N = 8861 | **p-value**2 |
| --- | --- | --- | --- | --- |
| SBT (min) | 1,772 | 212 (148, 322) | 206 (149, 300) | 0.4 |
| DBT (min) | 1,772 | 118 (91, 165) | 118 (93, 159) | 0.9 |
| Decision time | 1,772 | 73 (30, 165) | 65 (30, 140) | 0.3 |
| TIMI 3 | 1,772 | 701 (79%) | 687 (78%) | 0.4 |
| TIMI 1-2 | 1,772 | 187 (21%) | 201 (23%) | 0.4 |
| HLOS | 1,772 | 4.0 (2.0, 5.0) | 4.0 (3.0, 5.0) | 0.13 |
| In-hospital death | 1,772 | 30 (3.4%) | 15 (1.7%) | 0.024 |
| Death at follow-up | 1,709 | 81 (9.6%) | 44 (5.1%) | <0.001 |
| 1Median (IQR); n (%) | | | | |
| 2Wilcoxon rank sum test; Pearson's Chi-squared test | | | | |

Supplemental Table 2: post-matching Operative Data

| **Characteristic** | **N** | **OR**1 | **95% CI**1 | **p-value**2 |
| --- | --- | --- | --- | --- |
| Male | 1,772 | 1.04 | 1.02, 1.07 | 0.001 |
| Age | 1,772 | 0.56 | 0.30, 1.09 | 0.074 |
| Diabetes type II | 1,772 | 0.49 | 0.26, 0.91 | 0.026 |
| Hypertension | 1,772 | 1.88 | 0.94, 3.54 | 0.060 |
| Dyslipidemia | 1,772 | 0.85 | 0.47, 1.55 | 0.60 |
| CAD (Family) | 1,772 | 2.59 | 1.23, 5.03 | 0.007 |
| Past Interventions | 1,772 | 1.33 | 0.50, 2.96 | 0.52 |
| Past ACS | 1,772 | 0.59 | 0.27, 1.19 | 0.17 |
| Shock | 1,772 | 42.8 | 22.5, 83.7 | <0.001 |
| SBT (per 10 min) | 1,772 | 1.02 | 1.01, 1.03 | <0.001 |
| DBT (per 10 min) | 1,772 | 1.02 | 0.99, 1.04 | 0.15 |
| Decision time (per 10 min) | 1,772 | 1.01 | 1.00, 1.02 | 0.013 |
| TIMI 3 | 1,772 | 0.19 | 0.10, 0.35 | <0.001 |
| TIMI 1-2 | 1,772 | 5.16 | 2.84, 9.55 | <0.001 |
| 1OR = Odds Ratio, CI = Confidence Interval | | | | |

Supplemental Table 3: post-matching Univariate Analysis for In-hospital mortality

| **Characteristic** | **OR**1 | **95% CI**1 | **p-value** |
| --- | --- | --- | --- |
| Age | 1.04 | 1.01, 1.07 | 0.014 |
| Male | 0.71 | 0.32, 1.64 | 0.4 |
| Smoker | 0.43 | 0.20, 0.90 | 0.028 |
| Past Interventions | 1.64 | 0.63, 4.02 | 0.3 |
| CAD (Family) | 0.66 | 0.26, 1.51 | 0.3 |
| Shock | 43.1 | 20.9, 92.8 | <0.001 |
| SBT (per 10 min) | 1.13 | 0.82, 9.77 | >0.9 |
| DBT (per 10 min) | 0.89 | 0.10, 1.24 | >0.9 |
| Decision Time (per 10 min) | 0.90 |  | >0.9 |
| TIMI 1-2 | 3.77 | 1.86, 7.73 | <0.001 |

Supplemental Table 4: psot-matching Multivariable analysis for in-hospital mortality


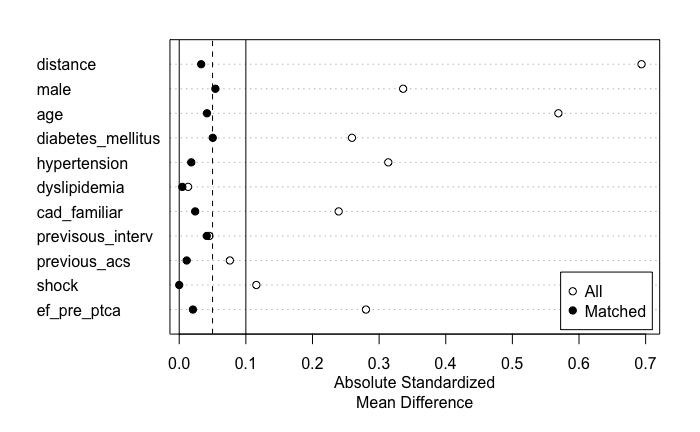


Supplemental Figure 1: pre- and post-matching plot of absolute standardized mean differences (SMD) across the covariates
